# Supplementary material for: Differential Inhibition of Human and Trypanosome Ubiquitin E1S by TAK-243 Offers Possibilities for Parasite Selective Inhibitors
Source: PubMed Central journal article supplement (PMC6838199; doi:10.1038/s41598-019-52618-3), 2019-11-07
Supplement: 41598_2019_52618_MOESM1_ESM.pdf [file 41598_2019_52618_MOESM1_ESM.pdf]

## **SUPPLEMENTARY INFORMATION**

Manuscript:

"Differential inhibition of human and trypanosome ubiquitin E1s by TAK-243 offers possibilities for parasite selective inhibitors."

D. Roeland Boer and Marie-José Bijlmakers \*

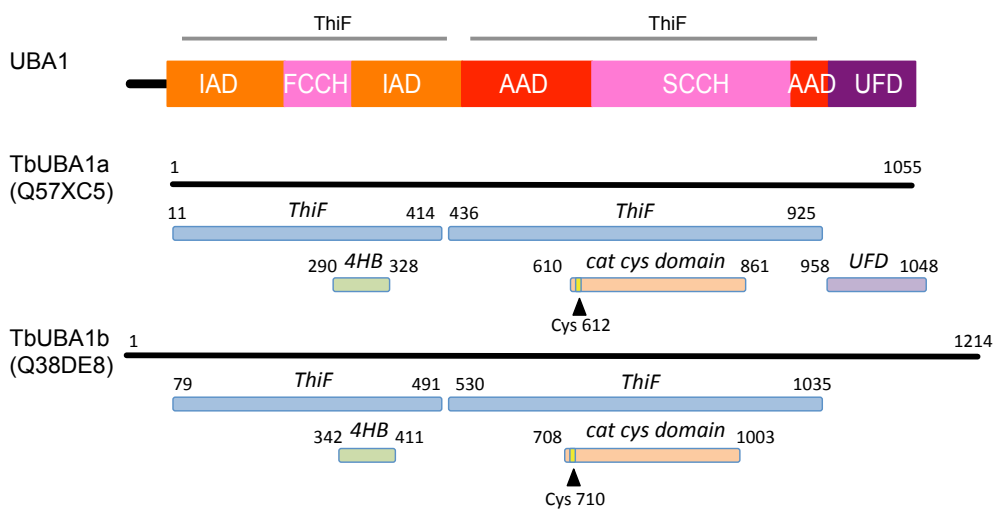

**Figure S1. Domains in TbUBA1a and TbUBA1b as found on the UniProt website.**

The domains are: the THIF-type NAD/FAD binding fold (ThiF, pf00899), the 4 helix bundle (4HB, pf16191), the UBA-E1-thiolCys (catalytic cys domain, pf10585) and the E1-Ubiquitin fold domain (UFD, pf09358).

Figure S2

P22314 | hUBA1\_ 1 -----MSSSPLSKRRVSGPDPKPGSNCSPAQSVLSEVPSVPTNGMAK  
 Q57XC5 | TbUBA1a 1 -----  
 Q38DE8 | TbUBA1b 1 MPKHQRDRFSNCPAFCSHTSNKLFRTTELTHY-SSDTTR--NVNINGFTKMSKMAGATADS  
 Q4DYM1 | TcUBA1a 1 -----  
 EKG03124.1 TcUBA1b 1 MRKHTRNHESDHYALYSK-NKKFYRTGTSQGFNCNKNKVDTA FVNAETEAEMSVEAIA  
 Q9NF77 | LmUBA1a 1 -----  
 E9AFD0 | LmUBA1b 1 -----ME

---

P22314 | hUBA1\_ 44 NGSEADID EGL---YSRQLYVLGHEAMKRLQTSSVLVSGLRGLGVEIAKNIILGGVKAVT  
 Q57XC5 | TbUBA1a 1 -MTSEEQRRQL---YNRQEYVVG TETQAKYGC TDVLVVGACGLGAEI IKNLTLTG VRSIK  
 Q38DE8 | TbUBA1b 58 SDASSAIDSKFLDQQSRTIGTYGLETMAKLISFKVLVVGCGGVGIETAKNLALAGVHTIT  
 Q4DYM1 | TcUBA1a 1 -MKHEEEKRQL---YNRQEYVVG TETQAKYGS TDVLVVGACGLGAEIVKNLALTG VRSIK  
 EKG03124.1 TcUBA1b 60 APAASAIDSKFLDKQSRTIGTYGLETMVKLISFKVLIVGCGGVGIEAKNLSMAGVHTII  
 Q9NF77 | LmUBA1a 1 MLSEEEQKRQL---YSRQEYVVG SETQAKYGS THVLVVGATGLSAEII IKNVLTG VKSVK  
 E9AFD0 | LmUBA1b 3 AERKALIDQRYLDKQSRTIGTYGLETMAKLIAFKVIIVGCGGVGIEIAKNLALAGIHTIR

---

P22314 | hUBA1 101 LHDQGT AQWADLSQFYLR EEDI--GKNRAEVSQPRLAELNSYVPVTAYTGPLVEDFLSG  
 Q57XC5 | TbUBA1a 57 VLDNGLATLQDLGTNFFLTPADM--GKPRAEVVAARAQELNRFVSVTAVDVP-LHEVI PA  
 Q38DE8 | TbUBA1b 118 LCDPKKAELKDMGVNF AVTETT IKAGLTRA EASKRLVAELNPNVVRV RTVDAI-DEAVVSE  
 Q4DYM1 | TcUBA1a 57 IMDSGTAILQDLGTNFFLTPQDV--GQPRADVVARRAQELNRFVHITAVTSP-LHEVI PD  
 EKG03124.1 TcUBA1b 120 LCDPAKAQPKDMGVNF AVTEAAVRSGLTRA EASQRLVSELNPNVVRVVDAL-SEAVVSQ  
 Q9NF77 | LmUBA1a 58 VLDDAVVTIEDLGTNFFLR PDDV--GKARGAAVAQA AKELNRFVEVSVSGD-PLLHI PA  
 E9AFD0 | LmUBA1b 63 FYDPRKPTVQDMGVNF AVTPQSMASGKTMAE LSAAYISELNPNTRVGVLAEL-TTATVAD

---

P22314 | hUBA1 159 FQVVVLTNT---PLEDQLRVGEFCHNRG--IKLVVADTRGLFGQLFCDFGEEMILTDSN  
 Q57XC5 | TbUBA1a 114 VHVVVFNQ---R TTTLLAENAMARKHN--VKFVACESRGVAGCVFVDAGPSFTVLDPD  
 Q38DE8 | TbUBA1b 177 VNCVVYTSAAADWSK TLLKWDQFCRTRTPAISFIFAFQGGSLASVFADHAPNFTVKDAD  
 Q4DYM1 | TcUBA1a 114 VHVVVFNQ---R TTA LVGENALARKHD--VKFVACESRGIVGCVFVDAGPSFSVLDPD  
 EKG03124.1 TcUBA1b 179 VNALVFTSAAPDYSRLT LKKNKFC HDHSSPISFIFAFQGGALGSVFADHGAHFTVKDPD  
 Q9NF77 | LmUBA1a 115 VHVVIYTNA---Y TSTLAAANKVARENK--VKFISCESRGVCGCIFVDGGESLDIVDTD  
 E9AFD0 | LmUBA1b 122 NVALIFTTAAPDLRL T T LSEWNAFCHNHTPAISFVLALQTGTMGSVFTDHGPSFVKDAD

---

P22314 | hUBA1 213 GEQPLSAMVSMVTKDNPGVVTCLDEARHGFE S GD-----FVSFSEVQGMVELNGN-  
 Q57XC5 | TbUBA1a 168 GEETVVCVVTNIS--RDGVVSLHEDKKHECEVGG-----RVFLTGLVSPESLNSTV  
 Q38DE8 | TbUBA1b 237 GRPMLQKLIVEVLT KRDKSGVEYTRVRYETPEGQTPGAFRDYTEVKFSEVKGLCKANGE-  
 Q4DYM1 | TcUBA1a 168 GEETVSCIVTSVS--RDGVVSLHEDKKHECEVGS-----HIFFTGVVSPA AVNADI  
 EKG03124.1 TcUBA1b 239 GRPMLQKSIVEVITKQDKTGTAYTRIRYETPEGQTPGALRDYTRFKFTEVRGLCKANGE-  
 Q9NF77 | LmUBA1a 169 GEDTVTCVVTAMS--SDGLVTLHEEKNHECEIGS-----KVYFTGLTELPQANTTE  
 E9AFD0 | LmUBA1b 182 GRPMLQKLITEVVTLRDKTGEMYTRI RYETPEGQTPGALRDYTQIKLSEVQGLLKP DGT-

---

P22314 | hUBA1 263 -----QPM-----EI--KVLGPYTF S ICD---TSNF-SDYI  
 Q57XC5 | TbUBA1a 217 DPFALHN GRATTECAQGDNSPTGASSLR LFEVS--EVVSPFHRLRLKDFGAIVGD-SPIE  
 Q38DE8 | TbUBA1b 296 -----SIN----GNVFKGVVCTGDPNTVRIYPSLESQGY-SAYE  
 Q4DYM1 | TcUBA1a 217 DPSTIHG-RC-----QSAASPLLKLFEVA--EVI SPFILRLKDFEAAVGN-SPIE  
 EKG03124.1 TcUBA1b 298 -----SVN----DNIFNGVMCPNDPRD TVRIYPSLESQGY-SAYE  
 Q9NF77 | LmUBA1a 218 -----PATPSAWKLFEVA--EVI SPHTMR LKGVSELV SAGTIIH  
 E9AFD0 | LmUBA1b 241 -----SAN----GQVYDGVICPSDPRD TVRVYPAFETQGY-SPYE

---

P22314 | hUBA1 288 --RGGIVSQVKVPKKISFKSLVASLAE P-DFVV-TDFAKFSRPAQLHIGFQALHQFCAQH  
 Q57XC5 | TbUBA1a 274 TGYACYLHTTKRKVLVGFKDLQLSVMQP-EFVT---LFDSEKKMMAPMTLHALFRAVHSH  
 Q38DE8 | TbUBA1b 331 --TAGFLHEMKESQQLKFRALSEALSCPGQFVPVSSMMDGSEESQSHLTFTALLRFFDKH  
 Q4DYM1 | TcUBA1a 263 VGTGAYLHTTKRHVLMGFKDLEQSVADP-TFVS---IFDSEKVNAPATLHALFRALHDH  
 EKG03124.1 TcUBA1b 333 --TGGFLHELKEVFQIEFRTLEEA VVC PGRFVPVSPMMDGSEESQSHLALHALLNFLDRH  
 Q9NF77 | LmUBA1a 255 VGT SAYLHTTKKGRREHYRTLGECLDNP-ECLM---IFDKEEKYTAATTLHAMFTAVARH  
 E9AFD0 | LmUBA1b 276 --TGGFLHELKEVKVLPFRPLSEALAAPGPFVSVSPMMDNSEESLTHVTLHALLRYADAH

Figure S2 continued

P22314 | hUBA1 344 -GRPPRPRNEEDAELVALAQAVNARALP--A-----  
Q57XC5 | TbUBA1a 330 -GKLPT--TPIEVRDVLKAAEAFFSSGND--Q-----  
Q38DE8 | TbUBA1b 389 G-RLPELHNLSEANEVVS LAKAVNEENKAADAKLEKVDHPMFLQHENKEFFPSRLAPPPPP  
Q4DYM1 | TcUBA1a 319 -GTLPT--TPTEVNSLLNLAEAYHSSCNS-----  
EKG03124.1 | TcUBA1b 391 G-RPPKLHDVSEAEAEALSIAKEININENKRRS-KANTETYQMFLPENEEFPARLAPSPPP  
Q9NF77 | LmUBA1a 311 -GCAPT--SPA EVEAVVKAQAQAINPNA-----  
E9AFD0 | LmUBA1b 334 AGKLPELHNAQAATAVVELAKKVLEENKAMPAPPEQRTTG---KPSNAEFPYKVP PPPPP

---

P22314 | hUBA1 373 --VQQNNLDEDLIRKLAYVAAGDLAPINAFIGGLAAQEV MKACSGKFMPI MQWLYFDAL E  
Q57XC5 | TbUBA1a 357 ---VHNGFDVETAESILSVMHGR LNPMDCFIGGLASQEV LKVC SGKFTPLRQWLYYDARE  
Q38DE8 | TbUBA1b 448 TPLCVETLDEGFVCSQALVSAEELQPLCAVWGAVLAQEIVKIT-GKYTPICQWLHVGYSS  
Q4DYM1 | TcUBA1a 345 -----GHLDVEFSK KALSVIHGNLNPMACLIAGIASQEV LKVC SGKFTPIQQWLYYDARE  
EKG03124.1 | TcUBA1b 449 VPLTVDEVDES FIRTQSLVADAE LQPLCAFFGAVVAQEIVKIT-GKYTPICQWFHFRCD A  
Q9NF77 | LmUBA1a 335 -----EATVMRTLLP VFGDLNPMACFIGGMAAQEALKVC SGKFTPLHQWVYYDARE  
E9AFD0 | LmUBA1b 391 APLVLES LDEKAVMAEALVARAE LQPLASFFGAVVAQEIVKIT-GKYSP IHQWFHLSCAA

---

P22314 | hUBA1 431 CLPEDKEVL-T-----EDKCL-QR--QN-RYD GQVAVFGSDLQEKLGKQKYFLV GAG  
Q57XC5 | TbUBA1a 414 LLVARGEMS-E-----T-GCVSTA-PGGSRYD GQIAVLGSS FQSF LSRQRFVIV GAG  
Q38DE8 | TbUBA1b 507 I LASNASYT-K-----SPQEY-KV--VDHRYKHLISLFGKTFVEKLN LKLFMVGCG  
Q4DYM1 | TcUBA1a 400 LLVARGEVA-E-----A-DLRPPS-PTGSR YDKQIAVLGAA FQSYLSKQRAFI I GAG  
EKG03124.1 | TcUBA1b 508 I LASSAMYT-S-----SG-DY-KP--TNSRYDHLIALLGKNFQKKLES LRVFMVGCG  
Q9NF77 | LmUBA1a 387 VLQVWQYGAKT VSASTLSS SAAVFPDAPAARSRYAGQEA VLGHAFQ EYLRQQKAFIV GAG  
E9AFD0 | LmUBA1b 450 VRPERADYS-S-----E--EF-RP--MNSRYDHI ISIFGKG FQQLQLNLR LFMVGCG

---

P22314 | hUBA1 478 AIGCELLKNFAMIGLGC GEGG EII VTDMDTIEKSNLN RQFLFRPVDVTKL KSDTAAAVR  
Q57XC5 | TbUBA1a 463 ALGCEL IKNVACMGF----G-AV SITDMDTIEMSNLSRQFLFRNSH I GQKSKVAGEAAR  
Q38DE8 | TbUBA1b 555 ALGCENIKNFALCGMSCGPRGSFV VTDNDRIEVS NLSRQFLFREENVGQPKSAVA VSRMK  
Q4DYM1 | TcUBA1a 449 ALGCEL IKNACMGF----G-GISITDMSIEISNLSRQFLFRNSH I GQHKSRVAGEAAM  
EKG03124.1 | TcUBA1b 555 ALGCENIKNFALCGVACGPN G SLLVTDNDRIEVS NLSRQFLFREENVGQPKSVA A AARMR  
Q9NF77 | LmUBA1a 447 ALGCEL IKNVALMGF----G-EV SITDMDTIEMSNLSRQFLFRNH I GRPKSVVAEA EAG  
E9AFD0 | LmUBA1b 496 ALGCENVKNFALCGITCGTGGSLV VTDNDRIEVS NLSRQFLFREENVGQSKSAAATARMR

↓

---

P22314 | hUBA1 538 QMNPHIRVTS HQNFVFPDTERIYDDDFQNL DGVANALDNV DARMYMDRRCVYR KPLLE  
Q57XC5 | TbUBA1a 518 AINGDLKVSAYLEVFQETENVFDEKFWESHSLV LNALDNVSRKYVDARCLFRKPLFE  
Q38DE8 | TbUBA1b 615 SINKDVKADARQDYVSNTEHIYHDVFWNGLDA VVNALDNMETRL YVDQKCVNFHKILVE  
Q4DYM1 | TcUBA1a 504 AINHDLHVT SFVEVSVETE GIFNEAFWD SHAVV LNALDNVQSRKYVDSRCLFYKPLFE  
EKG03124.1 | TcUBA1b 615 IMNKDVAIDPRQDYVATTEHLYHDI FWDGLDVV VNALDNMETRL YVDQKCVNFHKILVE  
Q9NF77 | LmUBA1a 502 HINADVKITAYEAMPE TEAIFNE DFWVQQA VILNALDNVMSRKYVDSRCLFYQKPLLE  
E9AFD0 | LmUBA1b 556 QMNP DANVDARQDEITTEHLYPDTFWQSLNVV VNALDNIEARLYVDQKCVRFQKVLVE

\*

---

P22314 | hUBA1 598 SGT LGTKGNVQVVIPFLTESYSSSQDPPEK-SIPICT LKNFPNAIEHTIQWARDEFEGLF  
Q57XC5 | TbUBA1a 578 SGT LGPKCNVQCVI P YCTESYSSSYDPPEK-SIPLCT LKNFPNVEHTIQWARDNFDAVF  
Q38DE8 | TbUBA1b 675 AGTMGTGGNVDIIVPGK TTSYSDGGAADTTGGI PMCTLRNFPPYTS DCTEWARAQFDDL F  
Q4DYM1 | TcUBA1a 564 SGT LGTKCNVQCIIP YCTESYSSSHDPPEK-AIPLCT LKNFPNAIEHTIQWARDNFHVL F  
EKG03124.1 | TcUBA1b 675 AGTMGTGGNVDIIVPGK TTSYADGGAADASGGI PMCTLRNFPIYFDH CIEWSRAQFDDL F  
Q9NF77 | LmUBA1a 562 SGT LGTKCNMQPAIPFVTESYSSSYDPPEK-GIPLCT LKNFPNAIEHTIQWARDLFHLL F  
E9AFD0 | LmUBA1b 616 AGTMGTGGNVDIIVPGRTSSYADGGAADQTGGI PMCTLRNFPIYIDH CIEWARAQFDDL F

---

P22314 | hUBA1 657 KQPAENVNQLTDPK-FVERTLR LAGTQPL-----EVLEAVQRSL-VLQRPQT  
Q57XC5 | TbUBA1a 637 FSTPSDVNGYLEDP TTFASNLERDPGTKSI-----VLKAVRDAL--VQWPKD  
Q38DE8 | TbUBA1b 735 VSPMQTVRQLLENPAAFTE RIKNEVDNNAQSAGERLSLVEKNLGLIQGIQKVTTL SAGVS  
Q4DYM1 | TcUBA1a 623 TNTPEEVNSYLQDP TTFANLERDPATKTM-----ALKAVRDAL--LRPMD  
EKG03124.1 | TcUBA1b 735 VFPMQTVEQLVEDPTAFKAR IEREINAAQSSGERLSLVEKHLGLIHLPLQKVL SNLSSGVN  
Q9NF77 | LmUBA1a 621 VSVPADVNQYLN DVPVAFANSLRNDPAAADA-----ALQNVNDAL--SRWPQN  
E9AFD0 | LmUBA1b 676 VSPMQAAQQI IEDPAAF TQRIHHEVSSGSSAGERLSLIDKNVGP LKLLKRTL TILADGPT

Figure S2 continued

P22314 | hUBA1 703 WADCVTWACHHWHHTQYSNNIRQLLHNFPPDQLTSSGAPFWSGPKRCPHPLTFDV----NN  
Q57XC5 | TbUBA1a 682 AADCVRMARSLFHEYFNSSFQQLLHNLPLDKRNDNGDLFWSGAKKPKPKQEFVSV----DS  
Q38DE8 | TbUBA1b 795 MEKCVQCWETMFLFRDRILDQRSFPKDAKKKNGEKFWSGHRKYPTPLEVNIKALSSD  
Q4DYM1 | TcUBA1a 668 AADCVRIARRLYHEYFSDAFRQLLYNIPIDKRNENGELEFWSGAKKPPTPQEFSP----DS  
EKG03124.1TcUBA1b 795 MEKCFQCAWELMFYLFDRDRIMDLQRSFPRDAKKKNGEDFWSGHRKYPTALNVDPKTIASN  
Q9NF77 | LmUBA1a 666 EQNCVRLARLLYQEHFNDGFRQLLHSIPLDKRNEGQLEFWGGAKKPPTPQEFVSV----NS  
E9AFD0 | LmUBA1b 736 MDRCVALGWELQFKMFRDRILDQLAAFPGRGAKKKNGEDFWSGHRKYPTALQVTAADIATN

---

P22314 | hUBA1 759 PLHLDYVMAAANLFAQTYGLTG--SQ-----DRAAVATFLQSVQVPEFTP  
Q57XC5 | TbUBA1a 738 ELNVSFVYHCAKLLAQVYNLSAF-TL-----SVKEVAELAMQVAVPGFVFP  
Q38DE8 | TbUBA1b 855 PDVVEFLISAANLFCAMYGIHPQKHEPRLNDPKKRWMQQYRTLQDLWNGVMKNCTVPEYKFP  
Q4DYM1 | TcUBA1a 724 ELSMSFVYHCAYLLACVYGLPPF-TL-----SRADVAVAGETSVPFVFP  
EKG03124.1TcUBA1b 855 KDAVEFLIAASNLFCAMYGVHPKHEPFRNDANNRWMQQYRSLEWINKIIIEKREVPVYHP  
Q9NF77 | LmUBA1a 722 EQDTEFVYHCACLFAKVYQLPAF-SL-----SKEETARLAAAVTPDFVFP  
E9AFD0 | LmUBA1b 796 PDAKNFLVAAINLYACMFGVHPKHEARFNDEKNRWMQYRRTDAWIQAEVNKLPPTPAYVA

---

P22314 | hUBA1 802 KS-----GVKIHVSDQELQSANASVDDSRLEELKATLPSPDKLPFGKMYPIDFEKDDDD  
Q57XC5 | TbUBA1a 782 RE-----ARFETNEAENKEGAAAQLVGDLTMQDLPVVSQFNSRRMNPLVFEKDDPN  
Q38DE8 | TbUBA1b 915 GSVEGLDDDLLQSMKQEVSKDETTKEQTLNLLSSVVALAQKCHNMNTVPLDFEKDDDD  
Q4DYM1 | TcUBA1a 768 RQ-----AVFATSEAEK-EESVANLAAEIGLQDLPVSEFHGRRMVPEFFEKDDPT  
EKG03124.1TcUBA1b 915 GAVEGLDDDDILDAIQTHDGAKKEETKEEQLGQLLNCNIMTLAGSCLRGTKATPLDFEKDDDD  
Q9NF77 | LmUBA1a 766 RH-----AVFATSESQTSQQTSSS--RGLTVEQLPVAHFGRSRMRAEEFDFKDDIT  
E9AFD0 | LmUBA1b 856 GSVNLDLDDDLAADAQEGKQVSMEESEAE-LQGLLADVAALASKCKGSKAAALEFEKDDDD

---

P22314 | hUBA1 856 NFHMDFIVAASNLRAENYDIPSADRHSKLIAGKIIPAIATTTAAVVLVCLLELYKVVQG  
Q57XC5 | TbUBA1a 833 NSHMDYITACSNLRATAYSIPPADVHYTKRIAGRIIPAMVTTTALVTGLVGIEALKYLLL  
Q38DE8 | TbUBA1b 975 NFHIDFVAATSNLRARNYDIPTQDRFKVKLVAGKIIPAIATTTAAVTGLALIEYFKALLS  
Q4DYM1 | TcUBA1a 818 NHHVEYITACSNMRAVAYNIPPADVHHTKRIAGKIIIPAMVTTTALVTGLVGLVLEVKRLLM  
EKG03124.1TcUBA1b 975 NFHIDFVTAASNLRASNYDIPTQDRMKVKLVAGKIIIPAIATTTSAVTGLALIEYFKALQG  
Q9NF77 | LmUBA1a 815 NHHVQFITYCSNLRARAYSIPVADFNQTKRIAGNIIPAMVTTTSLVTGLVGFEMLKYLII  
E9AFD0 | LmUBA1b 915 NFQIDFVAAASNLRAENYGIPTQDRLLKVKLVAGKIIIPAIATTTSAVTGLGLIELFKVLQN

---

P22314 | hUBA1 916 HRQ-----LDSYKNGFLNLALPFFGFSEPLAA--PRH  
Q57XC5 | TbUBA1a 893 AHRENGAQGLAKANP-----IT--EKVQEEYLSLYRNAFVNVALPFMAFSDPIAA--PAK  
Q38DE8 | TbUBA1b 1035 NDVSLRNGMLDIGT-----NN-YVLFERD-----APLKHRTVRVDKTYLPEQ  
Q4DYM1 | TcUBA1a 878 TQRQERSGMPANAVP-----TY--EEIQKQ-LSIYRNAFVNIALPFIASFDPPIA--SGA  
EKG03124.1TcUBA1b 1035 NDISCLRNGMIDVGT-----NN-YVLFERD-----APIKNRTKIVSTYLPEQ  
Q9NF77 | LmUBA1a 875 QFHHARKPAVNGTGS SHGNFYLDADEEPEKLVTLFRSAFVNIALPFIASFDPPIA--PSH  
E9AFD0 | LmUBA1b 975 KDISVLRNGMLDVGT-----NN-YVLFERD-----LPKINFTKVVATYIPEQ

---

P22314 | hUBA1 946 QYY-----NQEWTLWDRFEVQGLQPNGEEMTLKQFLDYFKTE-----H  
Q57XC5 | TbUBA1a 944 TVP-----MPDGSSVRWG IWDRIDIN---EGRDITVKELVSI LEKR-----H  
Q38DE8 | TbUBA1b 1076 DYT YKKKVICLPEGY----TKYDMIEVP---ITKATTVQQFATELEKKNLNTLLPTGMNA  
Q4DYM1 | TcUBA1a 928 TYP-----LPDGTSVRWGIWDRIDVN---EGRDLTVQELVTVLESR-----Y  
EKG03124.1TcUBA1b 1076 DYT YKKKLIRVPDGF----TKYDSIDVP---ITIHTTVQQFATMLENQLNALLPAGTEG  
Q9NF77 | LmUBA1a 933 SYA-----LPSGKKLRWGIWDRIDVS---EGRDMLVKELVQLLHDR-----Y  
E9AFD0 | LmUBA1b 1016 DYT YKKKIIRVPEGF----TKYDMIRIP---VTPATTVKAFAAALEAVLNKTLPEGADY

---

P22314 | hUBA1 984 KLEITMLSQGV-SMLYSFFMPAAKLERLDQPMTEIVS-RVS--KR-----KLGRHVRL  
Q57XC5 | TbUBA1a 983 QLEIFIALPCGKMVYSQFG-NVKDR---DKPVSVVVREKTK-GEE-----KDELSCICF  
Q38DE8 | TbUBA1b 1128 GCEVSAIGVGKG-SLWNGLPKHANTNCSLMDIEKQKL-SEAGGKLRPFWFENRTHFHDL  
Q4DYM1 | TcUBA1a 967 QVELFIIALASGKIIYSQFG-NTKDR---GKPVSTVVLEKGE--QL-----QDGEDCCCL  
EKG03124.1TcUBA1b 1128 SCEIVGIGVGHG-MLWNGSKKHANTNLSLMQLIEQQKM-TEAGGKLSQPFWQNRTOFCLEL  
Q9NF77 | LmUBA1a 972 ELEVFMIALKNKMIYTEFGGKAKDK---EKRVSEVAQDKGE--KV-----QDGIDYFDL  
E9AFD0 | LmUBA1b 1068 AYEVDGLGVGKG-MLWNGRSSHANTNASLMKVI EQQKA-SEAGGTL PAFPWFQNRQFCDDL

Figure S2 continued

|                   |      |                                 |
|-------------------|------|---------------------------------|
| P22314   hUBA1    | 1035 | VLELCCNDESG-----EDVEVPYVRYTI--R |
| Q57XC5   TbUBA1a  | 1033 | VATGSIGDN-----DVDIPLIYYRYKDF    |
| Q38DE8   TbUBA1b  | 1186 | SVTVSIDDANVDEVDETATILLRIQQ-     |
| Q4DYM1   TcUBA1a  | 1016 | VATGSISDV-----DVDPVIRYRFRNF     |
| EKG03124.1TcUBA1b | 1186 | SVTVSLDDGDTSVDEADVETAMIRLRITQ-  |
| Q9NF77   LmUBA1a  | 1022 | VVTGMIGDND-----DVDVPIIRYRYRF-   |
| E9AFD0   LmUBA1b  | 1126 | SATVSI DDGDDTVDEVDETATVCLEIQQ-  |

**Figure S2. Amino acid alignments of hUBA1 and the trypanosomatid UBA1s used or mentioned in this study.**

Alignments were made with ClustalOmega and coloured with Boxshade. Red residues are identical, blue residues at least 50% similar between sequences. Residues that interact with TAK-243 in ScUBA1 based on PDB 5L6J are highlighted (see Figure 4). Colouring is as follows: residues that do not differ between hUBA1 (and ScUBA1) and the UBA1s of *T. brucei* are in grey; the gatekeeper residue is in yellow; other residues that were studied and mutated in this study (Figure 5) are in blue; residues that were not mutated but were studied in the structural models (Figure 6) are in green. The lines above the sequences indicate the separate domains with colours as in Figure 1 and Figure S1: the IAD in orange, the FCCH and SCCH in pink, the AAD in red and the UFD in purple. The catalytic cysteine is indicated with an asterisk and the gatekeeper with an arrow.

| Gene Locus     | size (AA) | ThiF domains | UniProt ID | E1              |
|----------------|-----------|--------------|------------|-----------------|
| Tb927.9.12650  | 1214      | 2            | Q38DE8     | UBA1 (Ub)       |
| Tb927.8.2640   | 1055      | 2            | Q57XC5     | UBA1 (Ub)       |
| Tb927.5.3430   | 796       | 1            | Q57UC3     | UBA2 (SUMO)     |
| Tb927.9.4620   | 467       | 1            | Q38F81     | UBA3 (Nedd8)    |
| Tb927.9.6040   | 387       | 1            | Q38EW4     | UBA5 (Ufm1)     |
| Tb927.10.11180 | 754       | 1            | Q389M1     | ATG7 (ATG8)     |
| Tb827.11.2330  | 505       | 1            | Q386S6     | MOCS3 (Urm1, S) |
| Tb927.2.4020   | 603       | 1            | Q586W2     | APPBP1 (Nedd8)  |
| Tb11.02.5410b  | 295       | 1            | Q384R4     | AOS1 (SUMO)     |

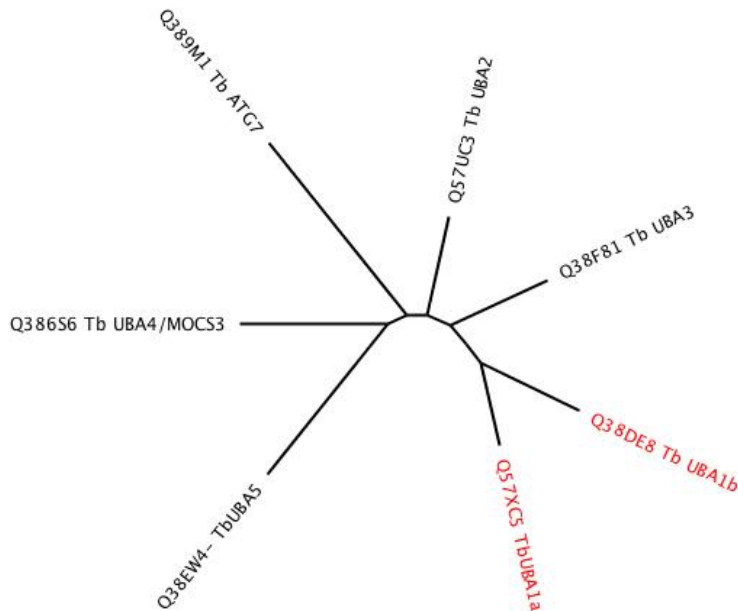

**Figure S3. ThiF domain containing proteins in *T. brucei*.**

Protein BLAST and ThiF domain (Pfam pf00899) searches in NCBI and TriTrypdp.org identified probable orthologues of the indicated E1 proteins. AOS1 and UBA2 together form the E1 for SUMO, APPBP1 and UBA3 the E1 for Nedd8. These proteins, excluding AOS1 and APPBP1 without an active adenylation domain (AAD), were aligned in UniprotAlign, phylogenetic analysis was performed with PhyML3.0 (Dereeper A et al. Nucleic Acids Res. 2008 Jul 1;36) and the tree depicted with FigTree software.

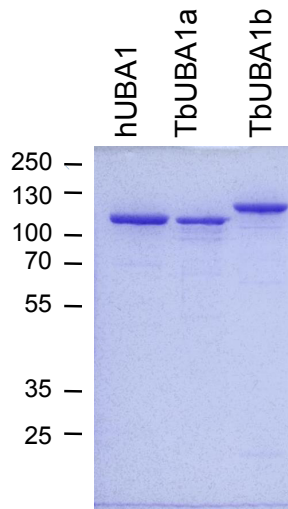

**Figure S4. The purified human and *T. brucei* UBA1 proteins**

The indicated UBA1s were purified from *E. coli* as described in Materials and Methods. A Coomassie stained acrylamide gel is shown.



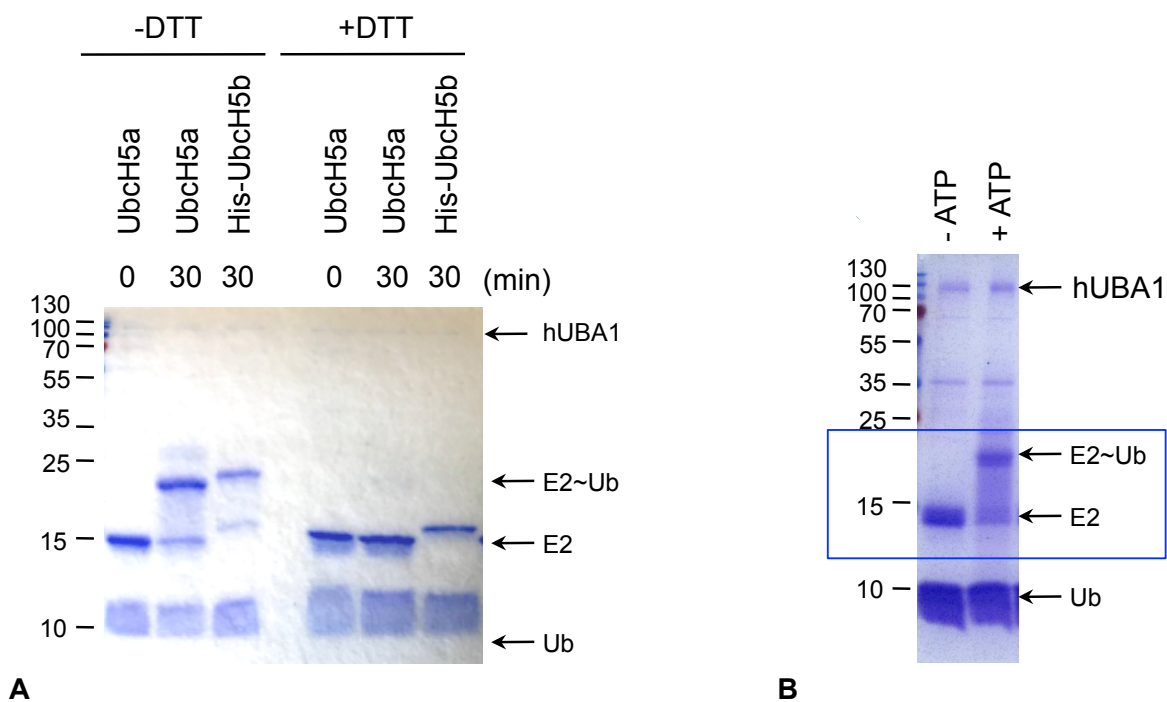

**Figure S5. The E1-E2 transthioesterification reactions used in this study**

E1-E2 transthioesterification reactions with hUBA1 were performed as described in Materials and Methods.

A. the transthioesterification reactions were performed with either UbcH5a purified in the laboratory or with commercial His6-UbcH5b (Enzo Life Sciences) for 0 or 30 min as indicated. The reactions were incubated with or without DTT before analysis by SDS-PAGE. The gel was Coomassie stained and dried. The disappearance of the E2~Ub conjugate in the presence of DTT illustrates that ubiquitin was bound to the E2 via a reducible thioester linkage.

B. the transthioesterification reactions were performed in the absence or presence of Mg~ATP (ATP) to show the dependence of the E2~Ub conjugate formation on ATP, as expected. The gel was captured following Coomassie staining using an ImageQuant LAS500 imager as for other gels in this study. The boxed area shows the part of the gels that are shown in Figures 1, 3, 5 and 7 of the main manuscript.

## A

```
hu Ub          1 MQIFVKTLTGKTTITLEVEPSDTIENVKAKIQDKEGIPPDQRLIFAGKQLEDGRTLSDYN
T.brucei Ub    1 MQIFVKTLTGKTIALALEVEASDTIENVKAKIQDKEGIPPDQRLIFAGKQLEEGRTLADYN
```

```
hu Ub          61 IQKESTLHLVLRLRGG 76
T.brucei Ub    61 IQKESTLHLVLRLRGG 76
```

## B

```
UbcH5a        1 MALKRIQKELSDLQRDPPAHCSAGPVGD-DLFHWQATIMGPPDSAYQGGVFFLTVHFPTD
Q57W45 T. brucei E2 1 MALRRIQKELKDLERDPPANTSGGPVNESDLFNWKATIIGPEDSPYAGGLFFLNIHFPSD
```

```
UbcH5a        60 YPFKPPKIAFTTKIYHPNINSNGSICLDILRSQWSPALTVSKVLLSICSLLCDPNPDDPL
Q57W45 T. brucei E2 61 YPFKPPKLQFTTKIYHPNINNGGICLDILKDQWSPALTISKVLLSVCSLLTDPNPDDPL
```

```
UbcH5a        120 VPDIAQIYKSDKEKYNRHAREWTQKYAM 147
Q57W45 T. brucei E2 121 VPDIARQYKTDRNAFNKTAMEWTRQYAM 148
```

### Figure S6. Alignments of human and T. brucei ubiquitin and E2.

**A.** Human and T. brucei ubiquitin (Q383T7) differ at 4 residues. Alignments were made with ClustalOmega and coloured with Expsy Boxshade. Identical residues are in red, similar residues in blue. Similarity groups are (G,A), (I,L,M,V), (D,E), (H,K,R) and (S,T).

**B.** T. brucei expresses an orthologue of the human E2 UbcH5a (E2D1, NP\_003329.1) that is 73% identical (Q57W45). Alignment and colouring as in A.

**A**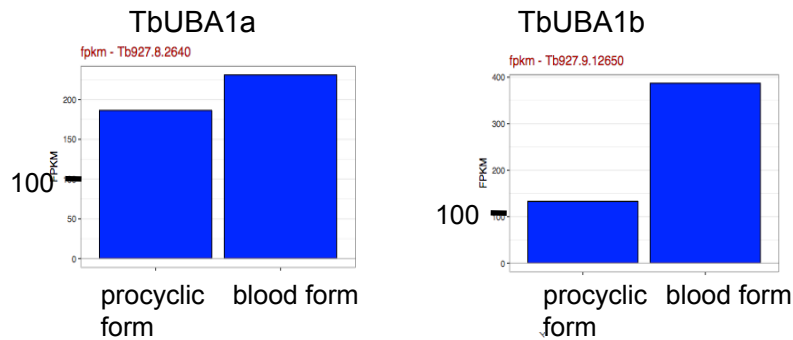

RNA-seq data  
<http://tritrypdb.org>

**B**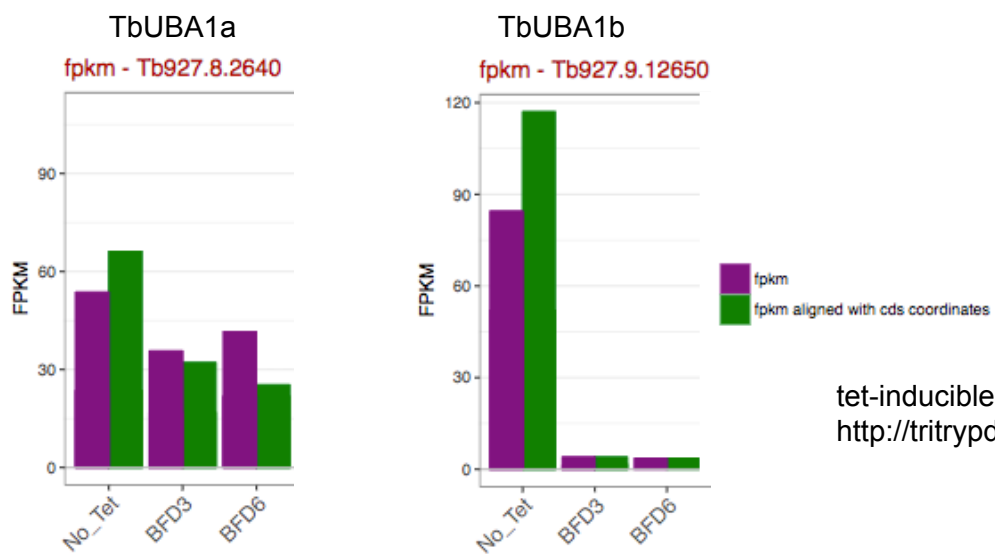

tet-inducible RNAi  
<http://tritrypdb.org>

**Figure S7. Expression of TbUBA1a and TbUBA1b; Effects of tet-inducible RNAi knockdown of TbUBA1a and TbUBA1b.**

**A.** RNA-seq data from <http://tritrypdb.org> website showing that TbUBA1a and TbUBA1b are both expressed in the blood form as well as the procyclic form of *T. brucei* (Siegel T. N. et al. Nucleic Acid Res. 38 (15): 4946 (2010)).

**B.** Data from <http://tritrypdb.org> of a tetracycline-inducible RNAi knockdown study of 9891 genes in *T. brucei* (Alsford S. et al Genome Res 21(6):915 (2011)). Transcript levels before induction of RNAi (No Tet), after 3 days (BFD3) and 6 days (BFD6) are shown.

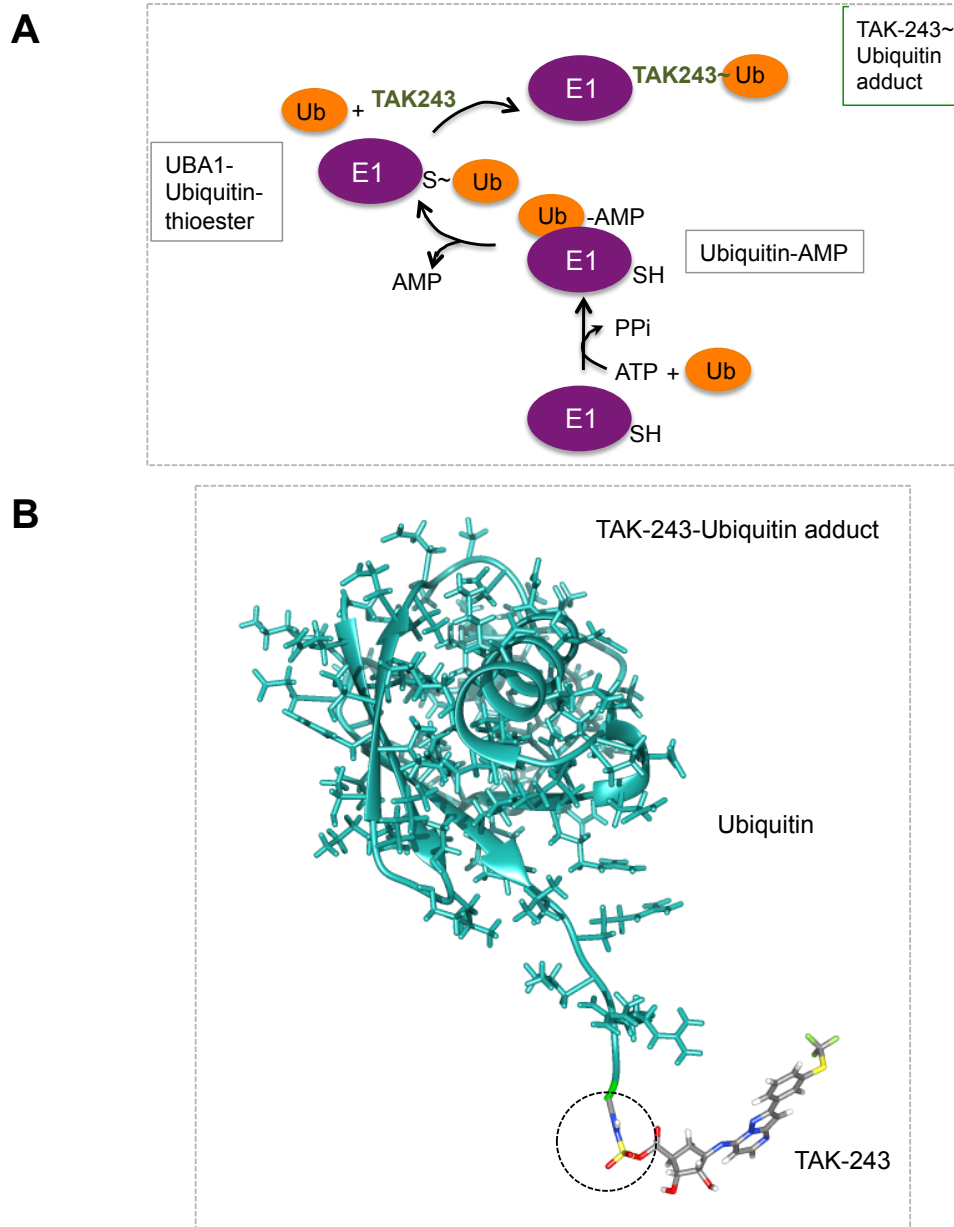

**Figure S8. TAK-243 forms a covalent TAK-243~ubiquitin adduct that can not be released from UBA1.**

**A.** In the presence of TAK-243, the thioester-bound ubiquitin on UBA1 is attacked so that a TAK-243~ubiquitin adduct is formed. This substrate-assisted inhibition was elucidated for MLN4924 and UBA3, the active subunit of Nedd8 E1 (Brownell et al. *Molecular Cell* 37:102, 2010).

**B.** The TAK-243~ubiquitin adduct bound to ScUBA1 (chain not shown) was taken from PDB 5L6J (Misra et al. *Structure* 25(7):1120, 2017). The circle indicates the covalent attachment of ubiquitin to the sulfamate nitrogen of TAK-243. The image was generated with UCSF Chimera (Pettersen et al. *J Comput Chem* 25: 1605-1612, 2004).

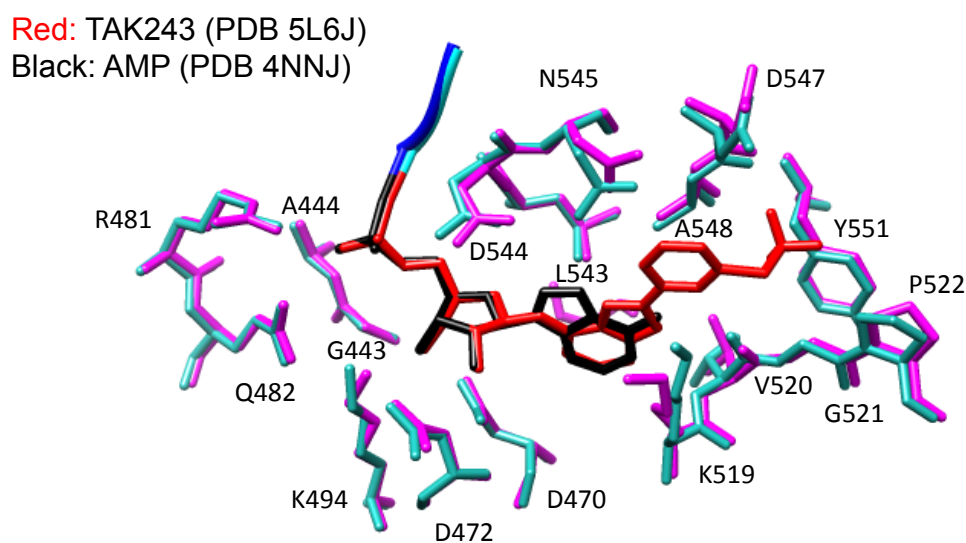

**Figure S9. TAK-243 protrudes further into the adenylation site of UBA1 than AMP.**

An overlay of residues from ScUBA1/TAK-243~ubiquitin (cyan, PDB 5L6J) with those from ScUBA1/AMP~ubiquitin (magenta, PDB 4NNJ). Only the residues that interact with TAK-243 in the adenylation site are shown. AMP is in black, TAK-243 in red. Ubiquitin residues are in blue. The image was generated with UCSF Chimera (Pettersen et al. J Comput Chem 25: 1605-1612, 2004).

## CLONING PRIMERS

### TbUBA1a

For gateway cloning and to introduce an upstream HRV 3C protease cleavage site. This was done in two rounds of PCRs. The first round was with primers Tb26Fw1 and Tb26Rev; the second round with primers GwB1-3C using the product of the first PCR as input (nucleotides for the HRV 3C cleavage site are in italics, nucleotides complementary to TbUBA1a are underlined, recombination sites are in normal text):

Tb26Fw1: CTGGAAGTGCTGTTTCAGGGCCCGACTAGTGAAGAGCAAAGACGG  
Tb26Rev : GGGGACCACTTTGTACAAGAAAGCTGGGTGTTAAAAATCCTTGACCTGTA  
ATAAATTAGAGG  
GwB1-3C GGGGACAAGTTTGTACAAAAAAGCAGGCTTCCTGGAAGTGCTGTTTCAGGG  
CCCG

### TbUBA1b

For restriction enzyme cloning into EcoRI and NotI site of pGEX4T3 (nucleotides complementary to TbUBA1b are underlined):

Tb09EcoFw: TCCCCGAATTCCCCAAACATCAACGGGATCGCTTTTCCAATTGTCC  
Tb09NotRev: CCGCGGCCGCTTATTGTTGGATGCGCAAAGTATTGTAGCGGTTTCAAC

### LmUBA1a

For restriction enzyme cloning into EcoRI and NotI site of pGEX4T3 (nucleotides complementary to LmUBA1a are underlined):

LmEcoFw: TCCCCGAATTCCTTGTCCGAGGAGGAGCAAAGAGG  
LmNotRev: CCGCGGCCGCTTATTAGAAGCGATAACGGTAGCGGATGATGGGCAC

## MUTAGENESIS PRIMERS

### TbUBA1a

Q534P-Fw: GAGAAGGTGGCGCCAGAAACAGAAAATGTG  
Q534P-Rev: CACATTTTCTGTTTCTGGCGCCACCTTCTC

E559D-Fw: CGCTTGACAATGTAGACAGCCGGAATATGTTG  
E559F-Rev: CAACATATTTCCGGCTGTCTACATTGTCAAGCG

S560A-Fw: CGCTTGACAATGTAGAAGCCCGGAATATGTTG  
S560A-Rev: CAACATATTTCCGGGCTTCTACATTGTCAAGCG

E559D,S560A-Fw: CGCTTGACAATGTAGACGCCCGGAATATGTTG  
E559D,S560A-Rev: CAACATATTTCCGGGCGTCTACATTGTCAAGCG

### TbUBA1b

S631P-Fw: GATTACGTGGGACCCAACACGGAACAT  
S631P-Rev: ATGTTCCGTGTTGGGTCCCACGTAATC

E656D,T657A-Fw: CTTGACAACATGGACGCTCGACTCTATGTTG  
E656D,T657A-Rev: CAACATAGAGTCGAGCGTCCATGTTGTCAAG

**Figure S10. Cloning an mutagenesis primers used in this study.**

**Full length gels for Figures 1 and 3**

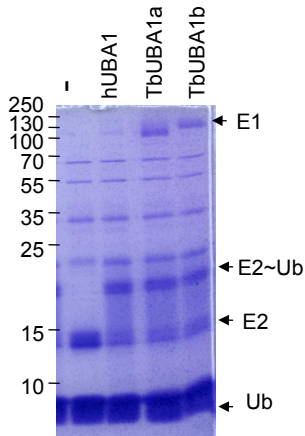

Figure 1D

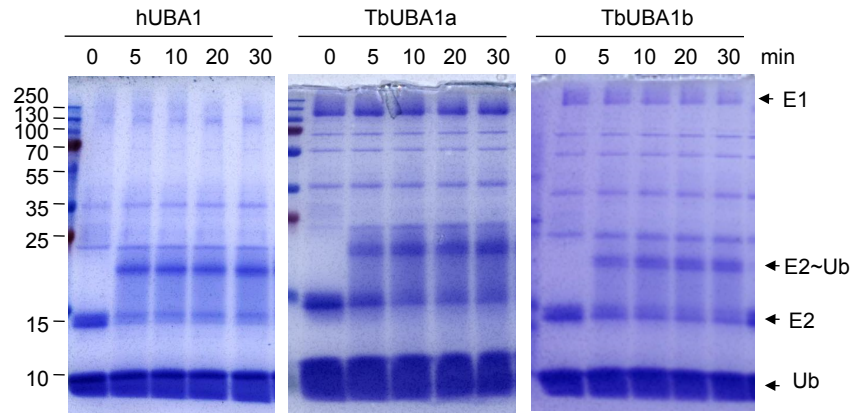

Figure 1E

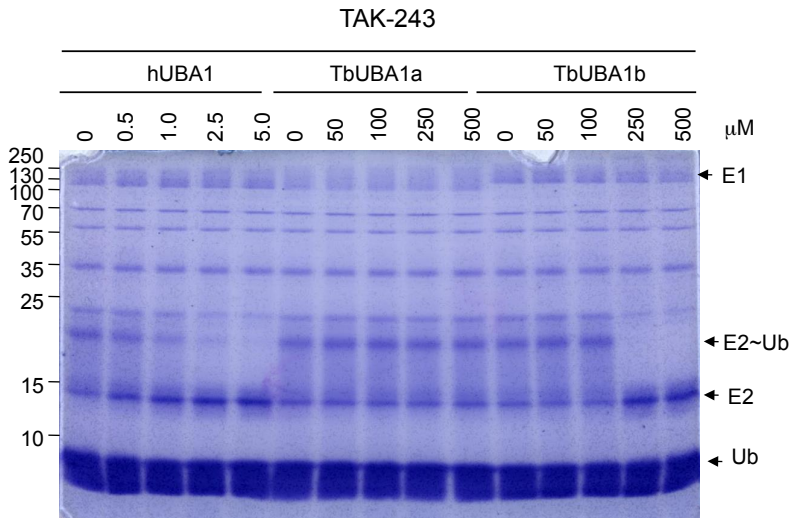

Figure 3A

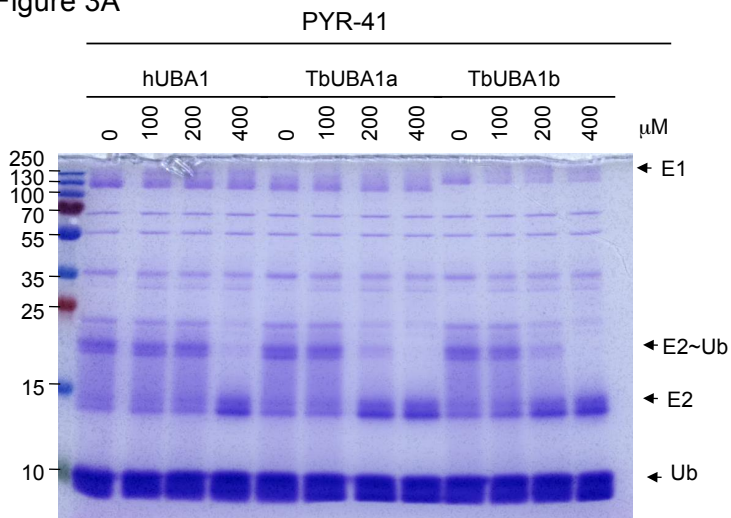

Figure 3C

**Full length gels for Figure 5A\***

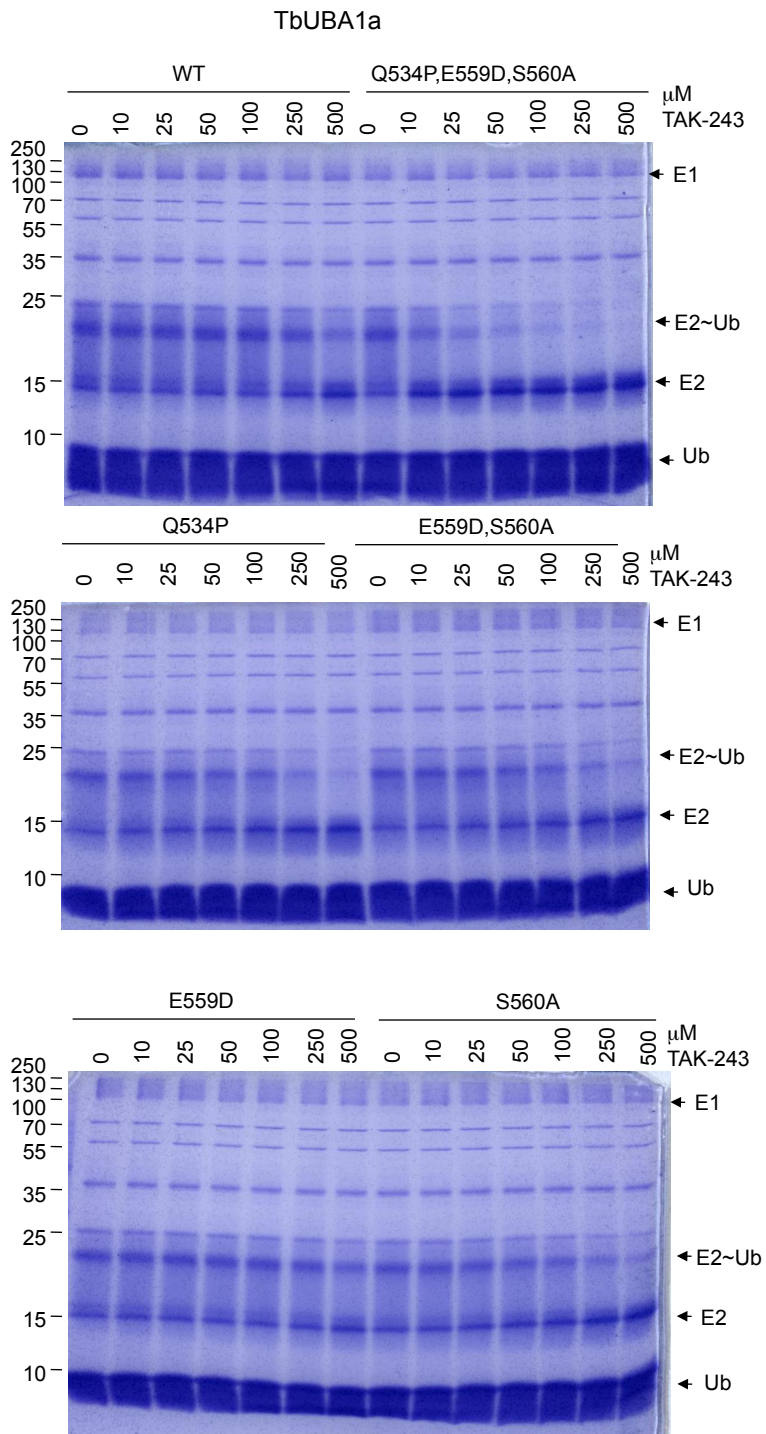

\* Note that the order of the mutants on these gels is different from the order in which they are displayed in Figure 5A.



**Full length gels for Figure 5B\* and C**

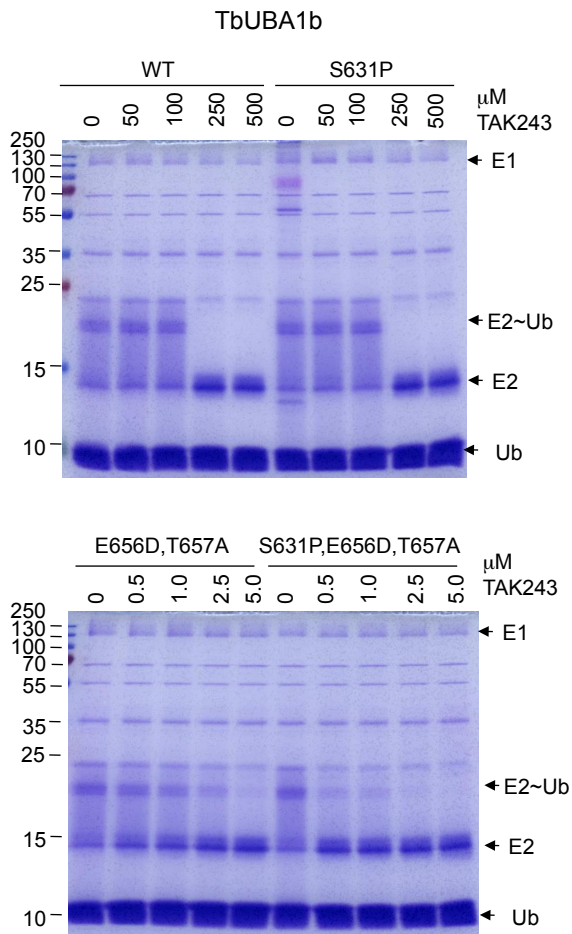

**Figure 5B**

\* Note that the order of the mutants on these gels is different from the order in which they are displayed in Figure 5A.

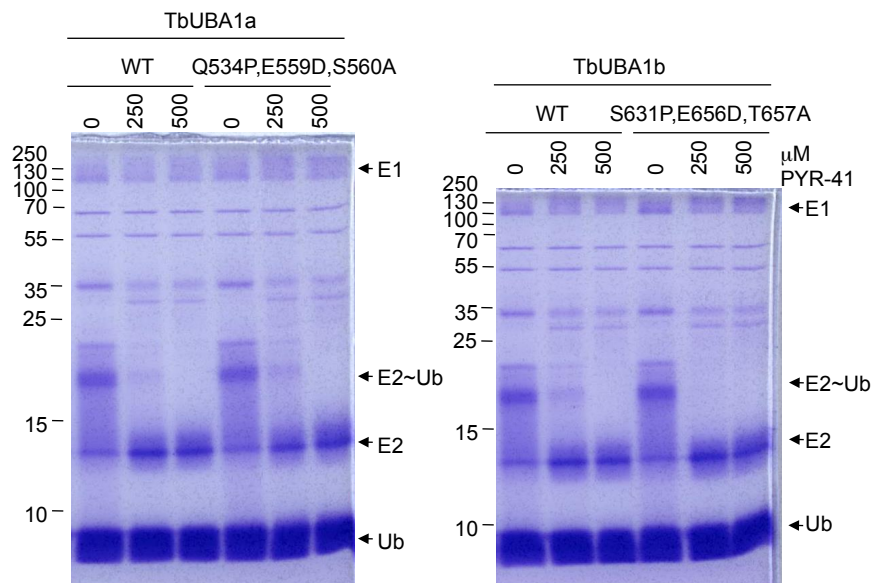

**Figure 5C**
